# Supplementary material
Source: publisher figshare collection journal article supplement (https://karger.figshare.com/ndownloader/files/12738764)
Supplement: Supplementary file 1 [file 12738764]

Supplementary Figure

Upper (A) and lower (B) saturation target limits before (left) and after (right) any changes in response to publication of oxygen saturation targeting trials [refs 13,14]: iNeo NICUs responding to survey and which had made changes.

Size of circles corresponds to the % of units within Network; Larger circle denotes a higher percentage. The median value for each network is indicated with “**+**”; n = number of NICUs.

ANZNN, Australian and New Zealand Neonatal Network; CNN, Canadian Neonatal Network; FinMBR, Finnish Medical Birth Register; ILNN, Illinois Neonatal Network; INN, Israel Neonatal Network; NRNJ, Neonatal Research Network of Japan; SEN1500, Spanish Neonatal Network; SNQ, Swedish Neonatal Quality Register; SwissNeoNet, Swiss Neonatal Network; TuscanNN, TIN Toscane on-line.
